# Supplementary material for: A defined human aging phenome
Source: Aging (Albany NY). 2019 Aug 12;11(15):5786–806. doi: 10.18632/aging.102166 (PMC11627290; doi:10.18632/aging.102166)
Supplement: Supplementary Tables [file aging-11-102166-s002.pdf]

## SUPPLEMENTARY TABLES

**Table S1. List of terms describing clinical features.**

|                                                                                                                                                                                                                                                                              |                                                                                                                                                                                                                                                                                                                                                                                                                                                                                                                                                                                                                                                                                                                                                                                                                                           |                                                                                                                                                                                                                                                                                                                                                       |                                                                                                                                                                                                                                                         |                                                                                                                                                                                                                                              |                                                                                                                                                                                                                                                                                                               |                                                                                                                                                                                                         |
|------------------------------------------------------------------------------------------------------------------------------------------------------------------------------------------------------------------------------------------------------------------------------|-------------------------------------------------------------------------------------------------------------------------------------------------------------------------------------------------------------------------------------------------------------------------------------------------------------------------------------------------------------------------------------------------------------------------------------------------------------------------------------------------------------------------------------------------------------------------------------------------------------------------------------------------------------------------------------------------------------------------------------------------------------------------------------------------------------------------------------------|-------------------------------------------------------------------------------------------------------------------------------------------------------------------------------------------------------------------------------------------------------------------------------------------------------------------------------------------------------|---------------------------------------------------------------------------------------------------------------------------------------------------------------------------------------------------------------------------------------------------------|----------------------------------------------------------------------------------------------------------------------------------------------------------------------------------------------------------------------------------------------|---------------------------------------------------------------------------------------------------------------------------------------------------------------------------------------------------------------------------------------------------------------------------------------------------------------|---------------------------------------------------------------------------------------------------------------------------------------------------------------------------------------------------------|
| <p>1. Graying of hair</p> <ul style="list-style-type: none"> <li>Gray Hair</li> <li>Greying of Hair</li> <li>Grey hair</li> <li>Canities</li> </ul>                                                                                                                          | <p>6. Decreased serum IGF-1</p> <ul style="list-style-type: none"> <li>Decreased IGF-1</li> <li>Low serum IGF-1</li> <li>Low IGF-1</li> <li>Decreased insulin like growth factor I</li> <li>Decreased serum insulin like growth factor I</li> <li>Low insulin like growth factor I</li> <li>Low serum insulin like growth factor I</li> <li>Decreased serum IGF 1; Decreased IGF 1</li> <li>Low serum IGF 1</li> <li>Low IGF 1</li> <li>Decreased insulin-like growth factor I</li> <li>Decreased serum insulin-like growth factor I</li> <li>Low insulin-like growth factor I</li> <li>Low serum insulin-like growth factor I</li> <li>Decreased insulin like growth factor I</li> <li>Decreased serum insulin like growth factor I</li> <li>Low insulin like growth factor I</li> <li>Low serum insulin like growth factor I</li> </ul> | <p>10. Cancer</p> <ul style="list-style-type: none"> <li>Malignancy</li> <li>Malignancy</li> <li>Neoplasm, malignant</li> <li>Unclassified tumor, malignant</li> <li>Tumour, malignant</li> <li>Tumor, malignant</li> <li>Unclassified tumour, malignant</li> <li>Malignant neoplasm</li> <li>Neoplasm, malignant</li> <li>Malignant tumor</li> </ul> | <p>16. Hypercholesterolemia</p> <ul style="list-style-type: none"> <li>Hypercholesterolaemia</li> <li>High cholesterol</li> </ul>                                                                                                                       | <p>26. Ischaemic heart disease</p> <ul style="list-style-type: none"> <li>Ischemic heart disease</li> </ul>                                                                                                                                  | <p>35. Cholelithiasis</p> <ul style="list-style-type: none"> <li>Gallstone</li> <li>Biliary calculus</li> <li>Cholelithiasis</li> <li>Stone - biliary</li> <li>Calculus - biliary</li> <li>Calculus in biliary tract</li> <li>Gallstones</li> <li>Gallbladder stones</li> <li>Gallbladder calculus</li> </ul> | <p>43. Seizures</p> <ul style="list-style-type: none"> <li>Seizure</li> <li>Epilepsy</li> <li>Convulsion</li> <li>Epileptic</li> </ul>                                                                  |
| <p>2. Muscle weakness</p> <ul style="list-style-type: none"> <li>Weakness of muscle</li> <li>Weakness of the muscle</li> <li>Musculoskeletal weakness</li> <li>Myoskeletal weakness</li> <li>Muscle strength reduced</li> <li>Decreased muscle strength</li> </ul>           |                                                                                                                                                                                                                                                                                                                                                                                                                                                                                                                                                                                                                                                                                                                                                                                                                                           | <p>11. Varicose veins</p> <ul style="list-style-type: none"> <li>Venous varices</li> <li>Varices</li> <li>Varicosities</li> </ul>                                                                                                                                                                                                                     | <p>17. Weight loss</p> <ul style="list-style-type: none"> <li>loss of bodyweight</li> </ul>                                                                                                                                                             | <p>27. Angina pectoris</p> <ul style="list-style-type: none"> <li>Chest pain</li> <li>Angina</li> <li>Cardiac angina</li> <li>Angina pectoris</li> <li>Stenocardia</li> <li>Anginal syndrome</li> </ul>                                      |                                                                                                                                                                                                                                                                                                               | <p>44. Parkinsonism</p> <ul style="list-style-type: none"> <li>Parkinson's disease</li> <li>Parkinson's disease</li> <li>Paralysis agitans</li> <li>Shaking palsy</li> <li>Parkinson disease</li> </ul> |
| <p>3. Facial Wrinkles</p> <ul style="list-style-type: none"> <li>Wrinkled facies</li> <li>Skin wrinkles</li> <li>Wrinkled skin</li> <li>Lined face</li> <li>Wrinkled face</li> <li>Perioral wrinkles</li> <li>Perioral rhytides</li> <li>Rhytid</li> <li>Rhytides</li> </ul> |                                                                                                                                                                                                                                                                                                                                                                                                                                                                                                                                                                                                                                                                                                                                                                                                                                           | <p>12. Cerebellar atrophy</p> <ul style="list-style-type: none"> <li>Atrophy of the cerebellum</li> </ul>                                                                                                                                                                                                                                             | <p>18. Urinary tract infection</p> <ul style="list-style-type: none"> <li>Urinary tract infectious disease</li> </ul>                                                                                                                                   | <p>28. Anxiety</p> <ul style="list-style-type: none"> <li>Anxiousness</li> <li>Feeling anxious</li> </ul>                                                                                                                                    | <p>36. Arteriosclerosis</p> <ul style="list-style-type: none"> <li>atherosclerosis</li> </ul>                                                                                                                                                                                                                 |                                                                                                                                                                                                         |
| <p>4. Cerebral atrophy</p> <ul style="list-style-type: none"> <li>Atrophy of the cerebrum</li> <li>Brain atrophy</li> <li>Atrophy of the cerebrum</li> <li>Atrophy of brain</li> </ul>                                                                                       | <p>7. Alopecia</p> <ul style="list-style-type: none"> <li>Hair loss</li> <li>Loss of hair</li> <li>Baldness</li> <li>Bald</li> <li>Falling hair</li> <li>Thinning hair</li> </ul>                                                                                                                                                                                                                                                                                                                                                                                                                                                                                                                                                                                                                                                         | <p>13. Visual acuity decrease</p> <ul style="list-style-type: none"> <li>Loss of vision</li> <li>Vision loss</li> <li>Visual impairment</li> <li>Impaired vision</li> <li>Visual difficulty</li> </ul>                                                                                                                                                | <p>19. Vertigo</p> <ul style="list-style-type: none"> <li>Dizziness</li> </ul>                                                                                                                                                                          | <p>29. Myocardial infarction</p> <ul style="list-style-type: none"> <li>Infarction of heart</li> <li>Cardiac infarction</li> <li>Heart attack</li> <li>Myocardial infarct</li> </ul>                                                         | <p>37. Hypertriglyceridemia</p> <ul style="list-style-type: none"> <li>Hyperlipidemia</li> <li>Hypertriglyceridaemia</li> <li>Lipidemia</li> <li>Lipidaemia</li> <li>Hyperlipidaemia</li> </ul>                                                                                                               |                                                                                                                                                                                                         |
| <p>5. Telangiectasia</p> <ul style="list-style-type: none"> <li>Telangiectasis</li> </ul>                                                                                                                                                                                    | <p>8. Congestive heart failure</p> <ul style="list-style-type: none"> <li>Congestive heart disease</li> <li>Congestive cardiac failure</li> </ul>                                                                                                                                                                                                                                                                                                                                                                                                                                                                                                                                                                                                                                                                                         | <p>14. Kyphosis</p> <ul style="list-style-type: none"> <li>Increased spinal curvature</li> <li>humpback</li> <li>Gibbosity</li> <li>Gibbus</li> <li>Hunchback</li> <li>Deformity of spine</li> </ul>                                                                                                                                                  | <p>20. Psychiatric symptom</p>                                                                                                                                                                                                                          | <p>30. Diabetes mellitus</p>                                                                                                                                                                                                                 | <p>38. Anosmia</p> <ul style="list-style-type: none"> <li>Loss of smell</li> <li>Loss of sense of smell</li> <li>Loss of the sense of smell</li> <li>Absent smell</li> <li>No sense of smell</li> <li>Sense of smell lost</li> <li>Sense of smell absent</li> </ul>                                           |                                                                                                                                                                                                         |
|                                                                                                                                                                                                                                                                              | <p>9. Hypertension</p> <ul style="list-style-type: none"> <li>High blood pressure</li> <li>Increased blood pressure</li> <li>Hypertensive disorder</li> <li>Hypertensive vascular disease</li> <li>Elevated blood pressure</li> <li>Raised blood pressure</li> <li>Blood pressure elevation</li> </ul>                                                                                                                                                                                                                                                                                                                                                                                                                                                                                                                                    | <p>15. Hearing loss</p> <ul style="list-style-type: none"> <li>Hearing impairment</li> <li>Loss of hearing</li> <li>Deafness</li> <li>Impaired hearing</li> <li>Hard of hearing</li> <li>Difficulty hearing</li> <li>Hypacusis</li> <li>Presbycusis</li> <li>Senile deafness</li> </ul>                                                               | <p>21. Obesity</p> <ul style="list-style-type: none"> <li>Fatness</li> <li>Overweight</li> <li>Adiposis</li> <li>Adiposity</li> </ul>                                                                                                                   | <p>31. Osteoporosis</p>                                                                                                                                                                                                                      | <p>39. Fracture</p> <ul style="list-style-type: none"> <li>Fractures</li> <li>Broken bones</li> <li>Broken bone</li> </ul>                                                                                                                                                                                    |                                                                                                                                                                                                         |
|                                                                                                                                                                                                                                                                              |                                                                                                                                                                                                                                                                                                                                                                                                                                                                                                                                                                                                                                                                                                                                                                                                                                           |                                                                                                                                                                                                                                                                                                                                                       | <p>22. Arthritis</p> <ul style="list-style-type: none"> <li>Osteoarthritis</li> <li>Arthrosis</li> <li>Joint inflammation</li> <li>Degenerative joint disease</li> <li>Degenerative arthropathy</li> <li>Osteoarthritis</li> <li>Arthropathy</li> </ul> | <p>32. Dementia</p> <ul style="list-style-type: none"> <li>Cognitive impairment</li> <li>Impaired cognition</li> <li>Cognitive disturbance</li> <li>Cognitive dysfunction</li> <li>Cognitive decline</li> <li>Cognitive deficit</li> </ul>   | <p>40. Cataract</p> <ul style="list-style-type: none"> <li>Cataracts</li> <li>Opacity of the lens</li> <li>Lens opaqueness</li> <li>Lens opacity</li> <li>Lens opacities</li> <li>Lenticular opacity</li> </ul>                                                                                               |                                                                                                                                                                                                         |
|                                                                                                                                                                                                                                                                              |                                                                                                                                                                                                                                                                                                                                                                                                                                                                                                                                                                                                                                                                                                                                                                                                                                           |                                                                                                                                                                                                                                                                                                                                                       | <p>23. Diabetes mellitus type 2</p> <ul style="list-style-type: none"> <li>Diabetes 2</li> <li>Type 2 Diabetes</li> <li>Diabetes mellitus Type II</li> <li>Diabetes Type 2</li> <li>Diabetes Type II</li> </ul>                                         | <p>33. Anemia</p> <ul style="list-style-type: none"> <li>Low hemoglobin</li> <li>Decreased hemoglobin</li> <li>Low erythrocytes</li> <li>Decreased erythrocytes</li> <li>Anaemia</li> <li>Hemoglobin low</li> <li>Haemoglobin low</li> </ul> | <p>41. Atrial fibrillation</p>                                                                                                                                                                                                                                                                                |                                                                                                                                                                                                         |
|                                                                                                                                                                                                                                                                              |                                                                                                                                                                                                                                                                                                                                                                                                                                                                                                                                                                                                                                                                                                                                                                                                                                           |                                                                                                                                                                                                                                                                                                                                                       | <p>24. Cardiac arrhythmia</p> <ul style="list-style-type: none"> <li>Heart arrhythmia</li> <li>Arrhythmia of the heart</li> <li>Arrhythmia</li> <li>Cardiac dysrhythmia</li> <li>Disorder of heart rhythm</li> </ul>                                    | <p>34. Stroke</p> <ul style="list-style-type: none"> <li>Apoplexy</li> <li>Apoplexia</li> <li>Cerebrovascular accident</li> </ul>                                                                                                            | <p>42. Neuropathy</p>                                                                                                                                                                                                                                                                                         |                                                                                                                                                                                                         |
|                                                                                                                                                                                                                                                                              |                                                                                                                                                                                                                                                                                                                                                                                                                                                                                                                                                                                                                                                                                                                                                                                                                                           |                                                                                                                                                                                                                                                                                                                                                       | <p>25. Edema</p> <ul style="list-style-type: none"> <li>Swelling</li> <li>Oedema</li> <li>Oedematous</li> <li>Edematous</li> </ul>                                                                                                                      |                                                                                                                                                                                                                                              |                                                                                                                                                                                                                                                                                                               |                                                                                                                                                                                                         |

**Table S2. List of 'aging' keywords.**

Aging  
Ageing  
Age-related  
Age related  
Age-associated  
Age associated  
Elderly  
Old age  
Senile  
Senility  
Retired  
Retirement

**Table S3. List of terms that were mined from PubMed based on the aging keywords (marked in yellow) and the clinical terms (marked in green).**

Ageing  
Aging  
Age-related  
Age related  
Age-associated  
Age associated  
Elderly  
Old age  
Senile  
Senility  
Retired  
Retirement  
Graying of hair  
Muscle weakness  
Facial wrinkles  
Cerebral atrophy  
Telangiectasia  
Decreased serum IGF-1  
Alopecia  
Congestive heart failure  
Hypertension  
Cancer  
Varicose veins  
Cerebellar atrophy  
Visual acuity decrease  
Kyphosis  
Hearing loss  
Hypercholesterolemia  
Weight loss  
Urinary tract infection  
Vertigo  
Psychiatric symptom  
Obesity  
Arthritis  
Diabetes mellitus type 2  
Cardiac arrhythmia  
Edema  
Ischaemic heart disease  
Angina pectoris  
Anxiety  
Myocardial infarction  
Diabetes mellitus  
Osteoporosis  
Dementia  
Anemia  
Stroke  
Cholelithiasis  
Arteriosclerosis  
Hypertriglyceridemia  
Anosmia

Fracture  
Cataract  
Atrial fibrillation  
Neuropathy  
Seizures  
Parkinsonism  
Disease  
Control  
Years  
Age  
Time  
Blood  
Weight  
Heart  
Mass  
Insulin  
Related  
Bone  
Ratio  
Risk of  
Infarction  
Pressure  
Cases  
Well  
Months  
Syndrome  
Glucose  
Diseases  
Population  
Activity  
Cell  
Function  
Diagnosis  
Follow  
Pain  
Artery  
Serum  
Failure  
Blood pressure  
Follow-up  
Cholesterol  
Primary  
Vascular  
Death  
Events  
Severe  
History  
Plasma  
Protein  
Brain  
Disorders  
Obese  
Expression  
Dose  
Days

Reduction  
Tissue  
Depression  
Drug  
Within  
Weeks  
Presence  
Diet  
Heart disease  
Breast  
Gene  
Dysfunction  
Receptor  
Fat  
Heart failure  
History of  
Regression  
Stress  
Report  
Liver  
Prevention  
Presence of  
Coronary artery  
Therapeutic  
HR  
Fibrillation  
Many  
Impairment  
Exercise  
Lipid  
Range  
Tumor  
Acid  
Smoking  
General  
Male  
Cardiovascular disease  
Inflammation  
Assessment  
Muscle  
Post  
Breast cancer  
Percent  
Often  
Sex  
Injury  
Various  
Main  
Body mass index  
PD  
Combination  
Single  
Hip  
Defined  
Female

Disorder  
Postoperative  
Family  
Infection  
Available  
Risk factor  
Sensitivity  
Metabolism  
Likely  
Administration  
Result  
Parameters  
LDL  
Volume  
Provide  
Vitamin  
Systolic  
Lipoprotein  
Lung  
People  
Chest  
Quality of life  
Damage  
Calcium  
Diagnostic  
Fasting  
Kidney  
Poor  
Energy  
Bleeding  
Pre  
HDL  
Concentration  
Moderate  
Confidence  
Neurological  
Recently  
Lead  
Found in  
Gender  
Frequently  
Coronary artery disease  
Acute myocardial infarction  
MRI  
AD  
Ischemia  
Hearing  
Joint  
Affected  
Prevent  
Bypass  
Body weight  
Hours  
Exposure  
Stenosis  
White

Nerve  
Caused by  
Physical  
activity  
Prognosis  
Process  
Angiotens  
in Balance  
DNA  
Complication  
Tolerance  
Hormone  
Enzyme  
Understanding  
Inhibition  
Medication  
Event  
Evidence of  
Animals  
Proteins  
Rheumatoid arthritis  
Arm  
Skin  
Order  
Toxicity  
Lesion  
Alcohol  
M2  
Onset of  
Coronary heart disease  
Education  
Community  
Platelet  
Died  
Affect  
Absence  
Approximately  
Postmenopausal  
SD  
Currently  
Carcinoma  
Prostate  
Bilateral  
Psychological  
Twenty  
Pathological  
Thrombosis  
Mineral  
Resonance  
Atrophy  
Unstable  
Absence of  
Symptom  
Knee  
Neck  
Transient

Vitamin d  
Ischaemic  
Kinase  
Binding  
Head  
Aspirin  
Peptide  
Ratios  
Operation  
Middle  
Hemoglo  
bin  
Radiation  
Plaque  
Functions  
Change in  
Antihypertensive  
Memory  
ECG  
Problem  
Little  
Center  
Injection  
Disability  
Percutaneous  
Vein  
Replacement  
Oxygen  
Hemorrhage  
Attention  
Asymptomatic  
Heart rate  
Occlusion  
Fatigue  
Iron  
Spine  
Past  
Every  
Materials  
Line  
Plus  
Necrosis  
Global  
Sodium  
Discharge  
Pharmacological  
Alzheimer's disease  
Trauma  
Triglyceride  
In addition to  
Marked  
Proliferation  
Homeostasis  
Metastatic  
Lung cancer  
Need for

Hand  
Childhood  
Nervous system  
Stimulation  
Maternal Creatinine  
Involving Medicine  
Prior to  
Illness  
PH  
Thirty  
Ultrasound  
Hypertrophy  
Modified  
Estrogen  
Review of  
mRNA  
Biological  
Marrow  
Cancers  
Sinus  
Plays  
Fold  
Family history  
Infarct  
Physiological  
Paper  
Total cholesterol  
Repair  
Delivery  
Distress  
Resection  
Graft  
Rehabilitation  
Fibrosis  
Renal failure  
Referred  
Phenotype  
Finding  
Material  
Nutrition  
Water  
Composition  
Thyroid  
At risk  
Birth  
Larger  
Tool  
Blood flow  
Concomitant  
Systolic blood pressure  
Probably  
Insufficiency  
Upon  
Angioplasty  
Growth factor  
Blind

X-ray  
Determined by  
Metastases  
Susceptibility  
Forty Albumin  
Attack  
Goal  
Urine  
Idiopathic  
Minutes  
Hip fracture  
Final  
Antibody  
Collagen  
Variation  
Markedly  
Rest  
Headache  
Premature  
Repeated  
Vascular disease  
Fever  
Secondary to  
Light  
Sclerosis  
Ocular  
Degeneration  
Physician  
Injuries  
Intra  
Initiation  
Initially  
Suffering  
Preventive  
Exposure to  
Limb  
CD  
Colon  
Chain  
Understood  
Possibly  
Lymph  
Compression  
Renal disease  
Tumour  
Amount  
Fifty  
Embolism  
Renal function  
Visual acuity  
Includes  
Histological  
Catheter  
Twice  
Poorly  
Exposed

Matrix  
Gene  
expression  
Red  
Observatio  
n Renin  
Pulse  
Shock  
Velocity  
Joints  
Race  
Interleukin  
Evidence for  
Falls  
Block  
Aorta  
Great  
Extent of  
Healing  
Mood  
Aggressive  
Black  
Gamma  
Tau  
Defect  
Back  
Amyloid  
Awareness  
Excretion  
Endoscopic  
Diets  
Wound  
Rupture  
One hundred  
Central nervous system  
Type II  
Rarely  
Bladder  
Heparin  
Smooth muscle  
Cartilage  
Diastolic blood pressure  
Fatty acid  
Confirm  
Se  
Skeletal muscle  
Sixty  
Remission  
Steroid  
Bowel  
Dogs  
Asthma  
Mortality rate  
Attenuated  
Frontal  
Motion

Address  
Testosterone  
Terminal Fall Oxidation Hypotension Hypoxia Obstruction Aggregation  
Normotensive  
Suppression  
Reporting  
Salt  
Periods  
Feeding  
Deficit  
Glaucoma  
Aneurysm  
Myocardium  
Carbohydrate  
Add  
Er  
Radical  
Antigen  
Appearance  
Pneumonia  
Accelerated  
Ear  
Balloon  
Gallbladder  
Referred to  
Dr  
Yr  
Hepatitis  
Root  
Rich  
Ventricle  
Cause of death  
Infected  
Calcification  
Lymphoma  
Urinary tract  
Potassium  
Anesthesia  
Essential hypertension  
Molecule  
As a result of  
Movement  
Strain  
Instability  
Bile  
Menopause  
Lens  
Smaller  
Hair  
Concept  
Face  
Turnover

Extremely  
Learning  
Income  
Leg  
Organization  
Employed  
Filtration  
Image  
Platelets  
Culture  
Base  
Seventy  
Gas  
Treated by  
Femur  
Gait  
Habits  
Severely  
Atp  
Exposed to  
Autopsy  
Act  
Aldosterone  
Chromosome  
Confirmed by  
Near  
Alcohol consumption  
Migration  
Centre  
Cut  
Oil  
Axis  
Differential diagnosis  
Physical examination  
Changed  
Fiber  
Pancreas  
Ventricular hypertrophy  
Institution  
Definition  
Cardiac output  
Spinal cord  
Deposition  
Perception  
Unchanged  
Resulting from  
Deviation  
Dopamine  
Walking  
Eighty  
Intraocular  
Angle  
Mobility  
Sub  
Capillary

Language  
Hb Orally  
EEG  
Consequence of  
Relief  
Glomerular filtration  
Arterial pressure  
Prophylaxis  
Air  
Task  
Type i  
Chemical  
Morphology  
Nurses  
Alcoholic  
Treated for  
Equivalent  
Irradiation  
Ulcer  
Abuse  
Drinking  
Schizophrenia  
Depressed  
Sub-  
Pt  
Foods  
Closure  
Cortisol  
Disruption  
Magnesium  
Serum creatinine  
Electron  
Start  
Transfer  
Hippocampus  
Increased by  
Sign  
Fusion  
Enhancement  
Serum cholesterol  
Tuberculosis  
Acceptable  
Leukemia  
Lymphocytes  
Malnutrition  
Difficulty  
Retention  
Unrelated  
Pilot  
Phosphatase  
Health status  
Stomach  
Adulthood  
Shift  
Cutaneous  
Androgen

Ninety  
Dilatation  
Saline  
RNA  
Aids  
T1  
Reductase  
Temperature  
AP  
Hyperplasia  
No evidence of  
AUC  
Phosphate  
Glucocorticoid  
Standing  
Emission  
Destruction  
Delirium  
Sampling  
Inner  
Erythrocyte  
Nucleus  
IgG  
Adenosine  
Fish  
Haemorrhage  
Juvenile  
Peripheral blood  
Accident  
Airway  
Solution  
Moderately  
Cerebrospinal fluid  
Thickening  
Ill  
Wk  
Tyrosine  
Preferred  
Heavy  
Bones  
Left ventricle  
Constant  
Easily  
Vascular resistance  
Differentiated  
Disc  
Monitor  
Dental  
Zinc  
Planning  
Force  
Glutamate  
Hypothyroidism  
Cytotoxic  
Serotonin

Hematoma  
Diuretic Section  
Enlargement  
Adjacent  
Localization  
Personality  
Ventilation  
Nifedipine  
Anatomical  
Drainage  
Substances  
Mitral valve  
The change  
Parathyroid  
AMP  
Forearm  
Speech  
Lactate  
SP  
Instrument  
Depletion  
Optic nerve  
Mental state  
Heat  
Advantage  
Glutathione  
Breathing  
Aortic valve  
Plate  
Melanoma  
Decreased by  
Folate  
Antibiotic  
Oxidase  
Dexamethasone  
Brainstem  
Strains  
Estradiol  
Amino acid  
Aetiology  
Insomnia  
Incontinence  
Substance  
Restoration  
Ion  
Twice daily  
Dehydrogenase  
Duct  
Spleen  
Gestation  
Liquid  
Nocturnal  
Located in  
Contraction  
Immune system  
Nurse

Cavity  
IGF-I  
Inappropriate  
Availability of  
Complement  
Reflex  
Pi  
Prosthesis  
Dwelling  
Vitamin e  
Mucosa  
Preceding  
Acetylcholine  
Nutritional status  
Ferritin  
Capsule  
Battery  
Today  
Outside  
Acetate  
Norepinephrine  
Lymphocyte  
Ingestion  
Alkaline phosphatase  
Phases  
Discrimination  
Adaptation  
Shortening  
Parathyroid hormone  
Junction  
Immunological  
Captopril  
Giant  
Reflecting  
Lipid peroxidation  
Fit  
Transformation  
Tension  
Ethanol  
Elimination  
Nutrients  
Tendon  
Verapamil  
Advanced age  
Color  
Milk  
Clinical diagnosis  
Alzheimer disease  
Sensitive to  
Resistant to  
Total body  
Propranolol  
TSH  
Neoplasms  
Cerebral blood flow

IgM  
Enalapril  
Immunoglobulin  
Immunity  
Dietary intake  
Confusion  
Intestine  
Calcitonin  
Melatonin  
Urea  
PP  
Reversal  
Retina  
E2  
Constipation  
Digoxin  
Nitrogen  
Prostaglandin  
Brown  
Connective tissue  
Neuron  
ADL  
Anaesthesia  
Amyloidosis  
No change  
Copper  
Growth hormone  
Cerebellum  
Mac  
Antidepressant  
Blue  
Atenolol  
Sulfate  
Biosynthesis  
Dystrophy  
Protease  
Gel  
Hypothalamus  
Serum albumin  
ACTH  
Return to  
Separated  
Skeleton  
Author  
IgA  
Aspartate  
Driving  
T-cell  
Immune response  
Forming  
Doctor  
Vaginal  
Atpase  
Fibroblast  
Superoxide dismutase  
Private

Perforation  
Chloride  
Systolic hypertension  
T3  
Probe  
Stimulus  
T cell  
Creatinine clearance  
Ganglion  
Fibre  
Arteritis  
Vitamin c  
Examined for  
Major depression  
RBC  
Longevity  
Fluorescein  
Suicide  
Mental status  
Newborn  
Organisms  
Influenza  
Adverse reactions  
Macular degeneration  
Monoclonal antibody  
Polypeptide  
Substantia nigra  
Vaccination  
O2  
Catecholamine  
NSAID  
Amygdala  
Ubiquitin  
Selenium  
Carnitine  
Alcoholism  
Progesterone  
Separation  
Aortic stenosis  
Bile duct  
Tooth  
Tablets  
Urinary incontinence  
T4  
Electrophoresis  
Brain tissue  
Outer  
Free radical  
Neovascularization  
Dopa  
Hydrochlorothiazide  
IL-2  
Cm2  
Senescence  
App  
Epinephrine

Job  
Noradrenalin  
e Epithelial  
cells  
Neurotransmitter  
Reading  
Peroxidase  
Cholecystitis  
Phosphorus  
Fluoride  
Teeth  
Ne  
Catalase  
Vaccine  
Angiopathy  
Fluorescent  
Myelin  
Globulin  
Vasopressin  
Atrophic  
Orientation  
Endurance  
Hydroxylase  
Age-related macular degeneration  
Lithium  
Attitude  
kDa  
Phospholipid  
Bovine  
HPLC  
Plasma membrane  
Phospholipids  
Ventral  
Diurnal  
Pigment  
Chromatin  
Cytoplasm  
Intelligence  
LH  
Disposition  
Iodine  
Equilibrium  
Choline  
Somatostatin  
Prolactin  
Married  
Dyskinesia  
BPH  
Handicap  
Benzodiazepine  
Sun  
Myosin  
Hybridization  
Pb  
Immunization  
Adrenergic receptor

Thyroxine  
Corticosterone  
Isoproterenol Mao  
Zoster  
Senile dementia  
MHC  
FSH  
Ache  
Granules  
Anticholinergic  
Competence  
Felodipine  
Stain  
Retarded  
Testis  
Fibronectin  
Elastin  
Institutionalized  
Acetylcholinesterase  
Aluminum  
Thymus  
Forebrain  
Thymidine  
Caries  
Decay  
Silver  
Living alone  
TRH  
SAM  
Soleus  
Down's syndrome  
Theophylline  
Crystallin  
Hearing aid  
Cyclic amp  
Ketanserin  
Scopolamine  
Acetyltransferase  
Retinal pigment epithelium  
Frail elderly  
Tetanus  
Involution  
Drusen  
Adenylate cyclase  
Tardive dyskinesia  
CHAT  
Senile cataract  
Antiserum  
Twitch

**Table S4. List of 105 manually curated terms describing human aging.**

Graying of hair  
Muscle weakness  
Facial wrinkles  
Cerebral atrophy  
Telangiectasia  
Alopecia  
Congestive heart failure  
Hypertension  
Cancer  
Varicose veins  
Cerebellar atrophy  
Visual acuity decrease  
Kyphosis  
Hearing loss  
Hypercholesterolemia  
Weight loss  
Urinary tract infection  
Vertigo  
Psychiatric symptom  
Obesity  
Arthritis  
Cardiac arrhythmia  
Edema  
Ischaemic heart disease  
Angina pectoris  
Anxiety  
Myocardial infarction  
Diabetes mellitus  
Osteoporosis  
Dementia  
Anemia  
Stroke  
Cholelithiasis  
Hypertriglyceridemia  
Anosmia  
Fracture  
Atrial fibrillation  
Seizures  
Parkinsonism  
Cataract  
Decreased serum IGF-1  
Arteriosclerosis  
Neuropathy  
Cholesterol  
Depression  
LDL  
HDL  
Coronary artery disease  
Acute myocardial infarction  
Angiotensin  
Hemoglobin  
Heart rate  
Fatigue

Alzheimer's  
disease  
Triglyceride  
Renal failure  
Headache  
Renal disease  
Renal function  
Amyloid  
Fatty acid  
Asthma  
Testosterone  
Hypotension  
Hypoxia  
Glaucoma  
Aneurysm  
Calcification  
Lymphoma  
Potassium  
Platelets  
Ventricular hypertrophy  
Cortisol  
Magnesium  
Serum creatinine  
Leukemia  
Lymphocytes  
Glucocorticoid  
Glutamate  
Hypothyroidism  
Mitral valve  
Lactate  
Ferritin  
Acetate  
Parathyroid hormone  
TSH  
Cerebral blood flow  
Immunoglobulin  
Calcitonin  
Melatonin  
Urea  
Constipation  
Growth hormone  
Serum albumin  
Progesterone  
Urinary incontinence  
Epinephrine  
Noradrenaline  
Cholecystitis  
Prolactin  
Dyskinesia  
Thyroxine  
Caries  
Iron  
Renin

**Table S5. List of aging hallmark terms and their synonyms.**

|                                     |                       |            |           |
|-------------------------------------|-----------------------|------------|-----------|
| Genomic instability                 | Genome instability    | DNA damage |           |
| Telomere attrition                  | Telomere              | Telomeres  |           |
| Epigenetic alterations              | Epigenetic alteration | Epigenetic | Epigenome |
| Loss of proteostasis                | Proteostasis          |            |           |
| Deregulated nutrient sensing        | Nutrient sensing      |            |           |
| Mitochondrial dysfunction           | Mitochondria          |            |           |
| Cellular senescence                 |                       |            |           |
| Stem cell exhaustion                | Stem cell             | Stem cells |           |
| Altered intercellular communication | Inflammation          |            |           |
